# Supplementary material
Source: Springer Nature journal article supplement (https://www.springermedizin.de/resource/supplementary/12955_2005_219_MOESM4_ESM.pdf/9559926)
Supplement: MOESM4 [file 9559926]

**RSDI****RSS-4**

Worse Same Better

|        |   |    |    |
|--------|---|----|----|
| Worse  | 3 | 10 | 4  |
| Same   | 8 | 12 | 19 |
| Better | 0 | 7  | 6  |

**SF-12 PCS**

Worse Same Better

|        |    |    |    |
|--------|----|----|----|
| Worse  | 8  | 7  | 2  |
| Same   | 10 | 18 | 11 |
| Better | 4  | 2  | 7  |

**RSDI****CES-D**

Worse Same Better

|        |    |    |   |
|--------|----|----|---|
| Worse  | 10 | 4  | 3 |
| Same   | 9  | 21 | 9 |
| Better | 6  | 4  | 3 |

**PCRQ**

Worse Same Better

|        |   |    |    |
|--------|---|----|----|
| Worse  | 9 | 4  | 4  |
| Same   | 5 | 22 | 12 |
| Better | 3 | 2  | 8  |
